# Supplementary material for: Antioxidants protect against diabetes by improving glucose homeostasis in mouse models of inducible insulin resistance and obesity
Source: Springer Nature journal article supplement (doi:10.1007/s00125-019-4937-7), 2019-07-15
Supplement: MOESM1 [file 16929240]

## Tables

**ESM Table 1** : Forward and reverse primers sequences.

| Gene          | Forward primer sequence      | Reverse primer sequence§     |
|---------------|------------------------------|------------------------------|
| <i>Tbp</i>    | 5'-GAAGCTGCGGTACAATTCCAG-3'  | 5'-CCCCTTGTACCCTTCACCAAT-3'  |
| <i>Lep</i>    | 5'-CAGGATCAATGACATTTACACA-3' | 5'-GCTGGTGAGGACCTGTTGAT-3'   |
| <i>Pparg2</i> | 5'-GCATGGTGCCTTCGCTGA-3'     | 5'-TGGCATCTCTGTGTCAACCATG-3' |
| <i>Adipoq</i> | 5'-CGATTGTCAGTGGATCTGACG-3'  | 5'-CAACAGTAGCATCCTGAGCCCT-3' |
| <i>Retn</i>   | 5'-CTGTCCAGTCTATCCTTGACAC-3' | 5'-CAGAAGGCACAGCAGTCTTGA-3'  |

**ESM Table 2:** adipocyte quantification primers

| primer                                               | Forward primer sequence                                                                                                                                                                                                                                                                                                                                                                                                                                                                                                                                      | Reverse primer sequence§     |
|------------------------------------------------------|--------------------------------------------------------------------------------------------------------------------------------------------------------------------------------------------------------------------------------------------------------------------------------------------------------------------------------------------------------------------------------------------------------------------------------------------------------------------------------------------------------------------------------------------------------------|------------------------------|
| Recombined<br>fl <sup>stop</sup> fl <sup>tdRFP</sup> | 5'- GCGCATGAACTCTTTGATGAC-3'                                                                                                                                                                                                                                                                                                                                                                                                                                                                                                                                 | 5'- TCGCGTTGAGGACAAACTC -3'  |
| ApoB                                                 | 5'- GTCCAGGTTGAATCACGGGT -3'                                                                                                                                                                                                                                                                                                                                                                                                                                                                                                                                 | 5'- AGGATCCTGCAAGGTCAAGC -3' |
| pUC57<br>insert<br>for standard<br>curve             | 5'-CTTGAAGCGCATGAACTCTTTGATGACGTCCTCGGAG<br>GAGGCCAGCATGGATCCAGCGCTAGCTTGGCTGGACGT<br>AAACTCCTCTTCAGACCTAATAACTTCGTATAGCATACA<br>TTATACGAAGTTATGCGGCCGACCGGTAAGCTTATCGAT<br>ACCGTCGATCCCCACTGGAAAGACCGCGAAGAGTTTGT<br>CCTCAACCGCGAGCTGTGGAGGTGGGGTCCAGGTTGAA<br>TCACGGGTTCTTCAGCACAATGCACAGTTCTCCAATGAC<br>CAAGAAGAAAATACGGCTTGACCTTGACAGGATCCTTAGA<br>CGGAGCCGGAGAACCTGCGTGCAATCCATCTTGTTCAA<br>TGGCCGATCCCATGGCGGCACAGATGAATTCTTAATAA<br>CTTCGTATAGCATACATTATACGAAGTTATGCGGCCG<br>ACCGGTAAGCTTATCGATACCGTCGATCCCCACTGGAA<br>AGACCGCGAAGAGTTTGTCTCAACCGC-3' |                              |

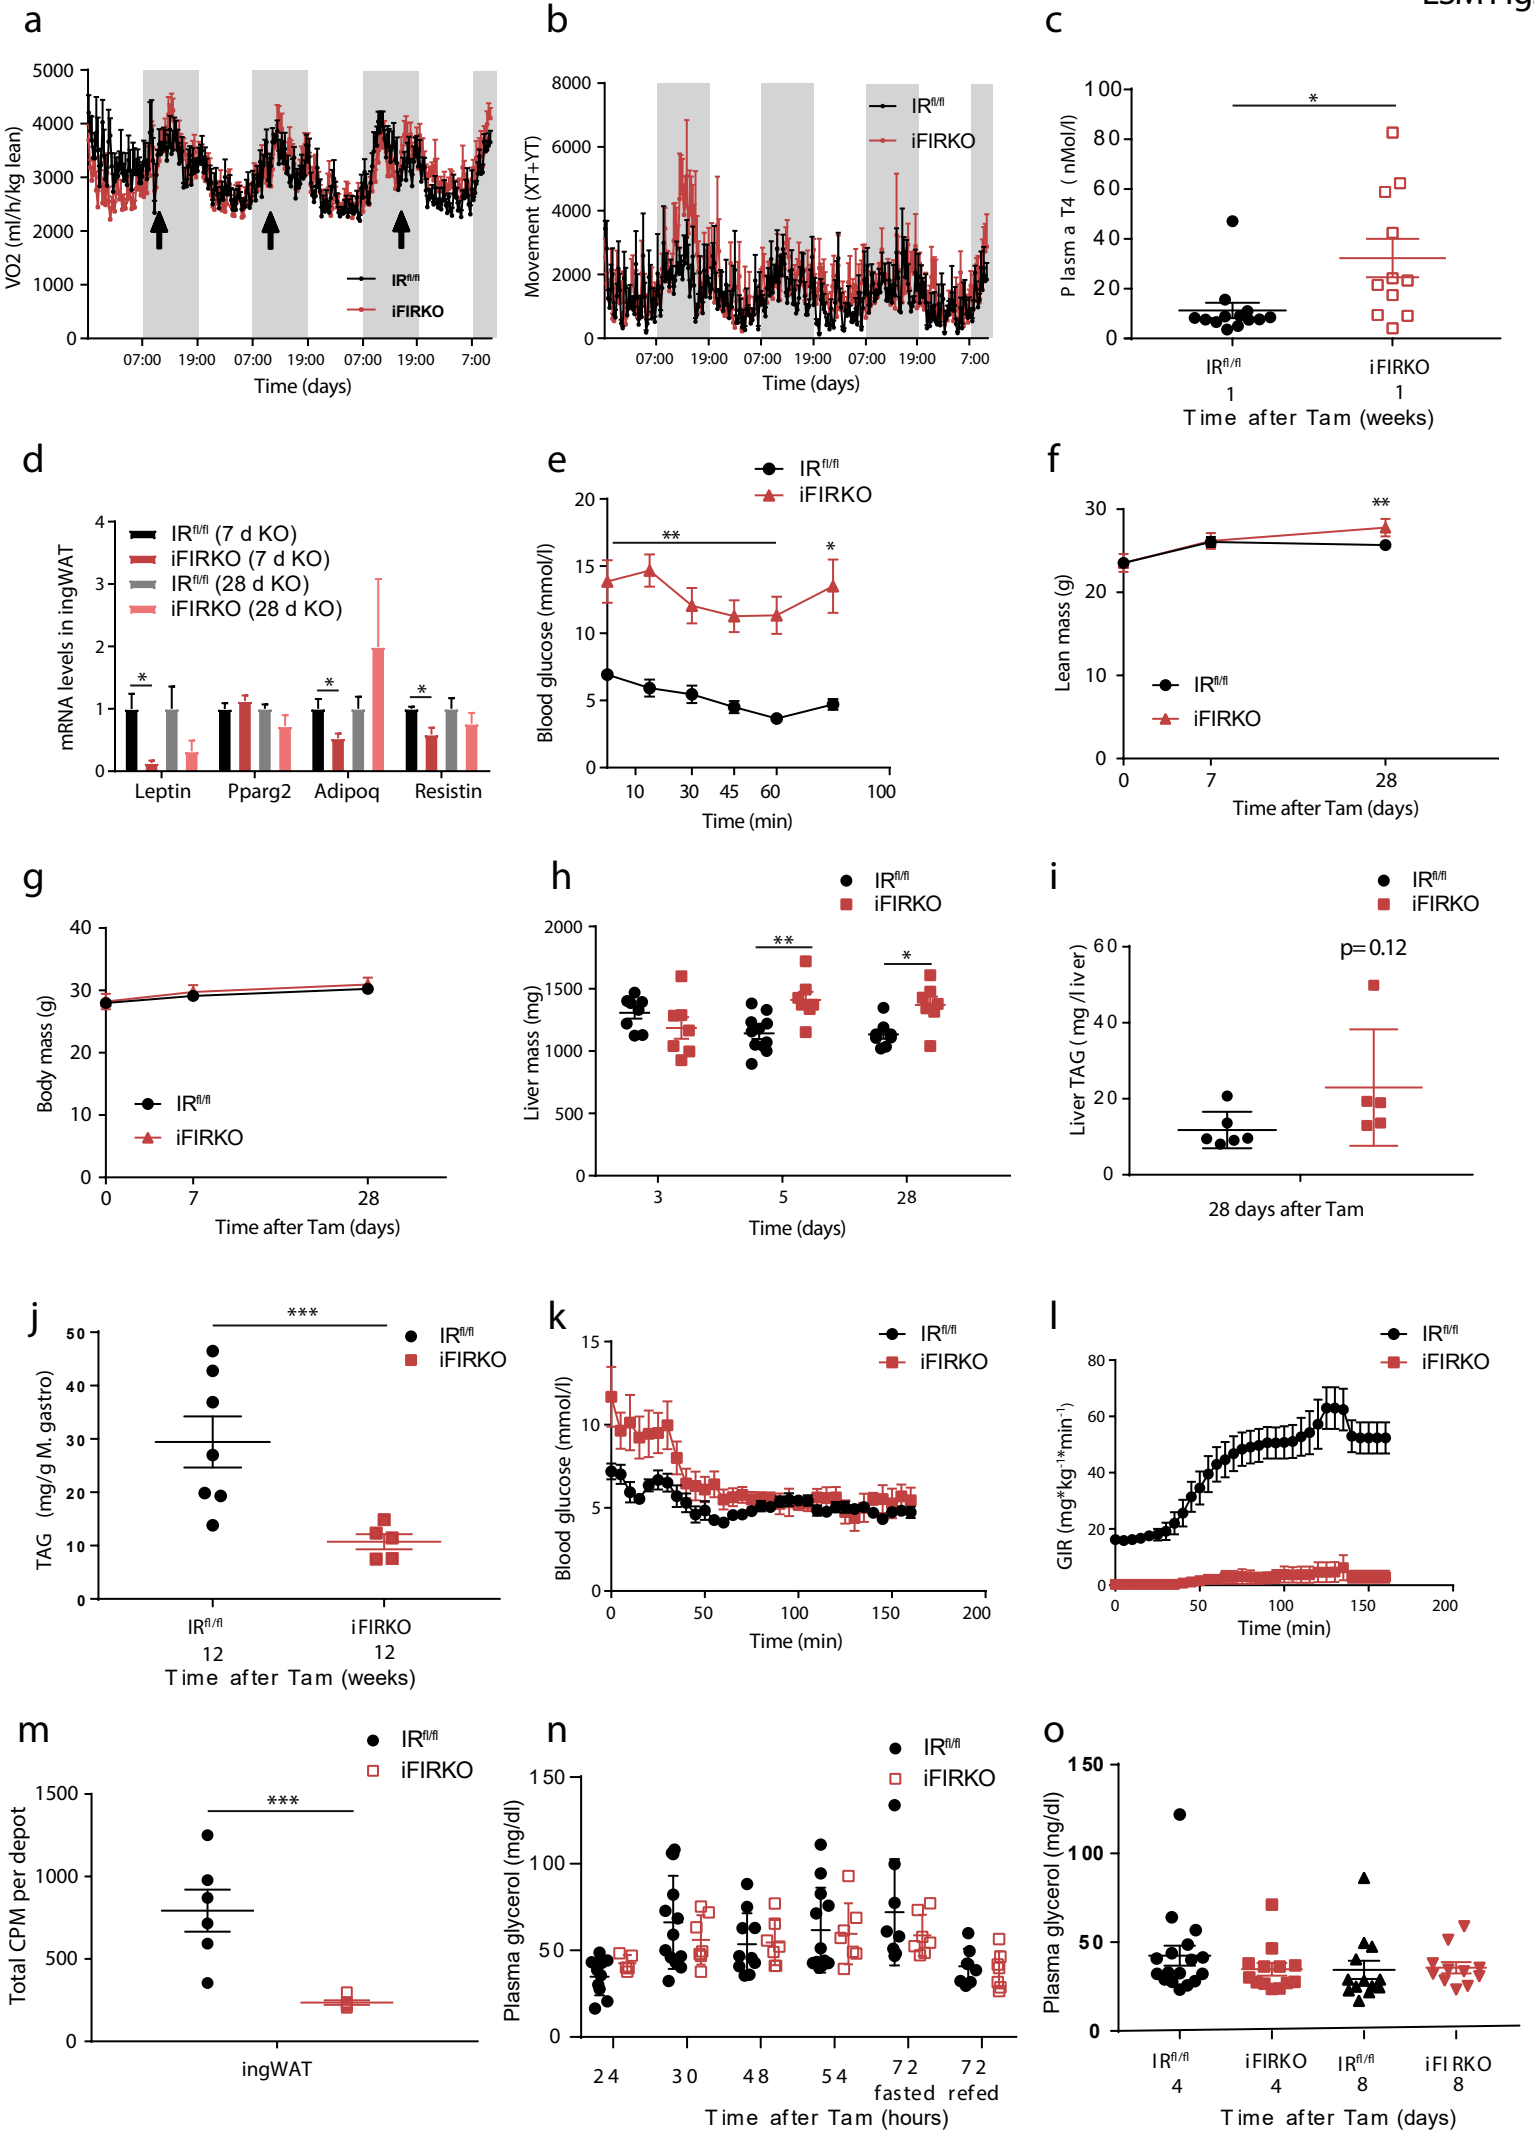

ESM Fig. 1: Inducible fat-specific IR knockout (iFIRKO) does not affect oxygen consumption rate, but leads to increased lean mass and reduced adipokine mRNA expression. (a) metabolic cage measurement oxygen consumption ( $VO_2$ ) and (b) movement (XT+YT) (n=5 for IR<sup>fl/fl</sup>;6 for iFIRKO). (c) Plasma thyroxine (T4) concentration 1 week after Tam. (d) *Lep*, *Ppar $\gamma$ 2*, *Adipoq* and *Restn* qPCR of ingWAT mRNA (n=4 for IR<sup>fl/fl</sup> 7d KO;5 for iFIRKO 7d KO;7 for IR<sup>fl/fl</sup> 28d KO;4 for iFIRKO 28d KO). (e) ITT, blood glucose over time in minutes after intraperitoneal injection of 0.6 U insulin per kg after 8 hours fasting in iFIRKO and IR<sup>fl/fl</sup> control littermates (n=5-6 for IR<sup>fl/fl</sup>;5-9 for iFIRKO). (f) Lean mass (g) body mass measured by EchoMRI 0,7 and 21 days after tamoxifen (n=8 for IR<sup>fl/fl</sup>;6 for iFIRKO). (h) Liver mass 3, 5 and 28 days after tam (n=8-11;7). (i) Amount of TAG measured per liver 4 weeks after Tam gavage. (j) Amount of TAG in M. gastro. (k) Blood glucose concentration during hyperinsulinemic euglycemic glucose clamp (9 for IR<sup>fl/fl</sup> ;7 for iFIRKO). (l) Glucose infusion rate during clamp (n=9 for IR<sup>fl/fl</sup>;7 for iFIRKO). (m) total counts per minute radiation uptake into ingWAT normalized to full depot mass. (n) Early time points blood glycerol concentration after induction of IR knockout in adipocytes. (o) Late time points blood glycerol concentration after induction of IR knockout in adipocytes. Mean+/-SEM. 2way ANOVA Turkey's multiple comparisons test one sign(e.g.\*)=p<0.05, two signs(e.g.)\*\*=p<0.01, three signs(e.g.\*\*\*)=p<0.005, four signs (e.g.\*\*\*)=p<0.001. TAG, triacylglycerol; Tam, tamoxifen; M. gastro, musculus gastrocnemius

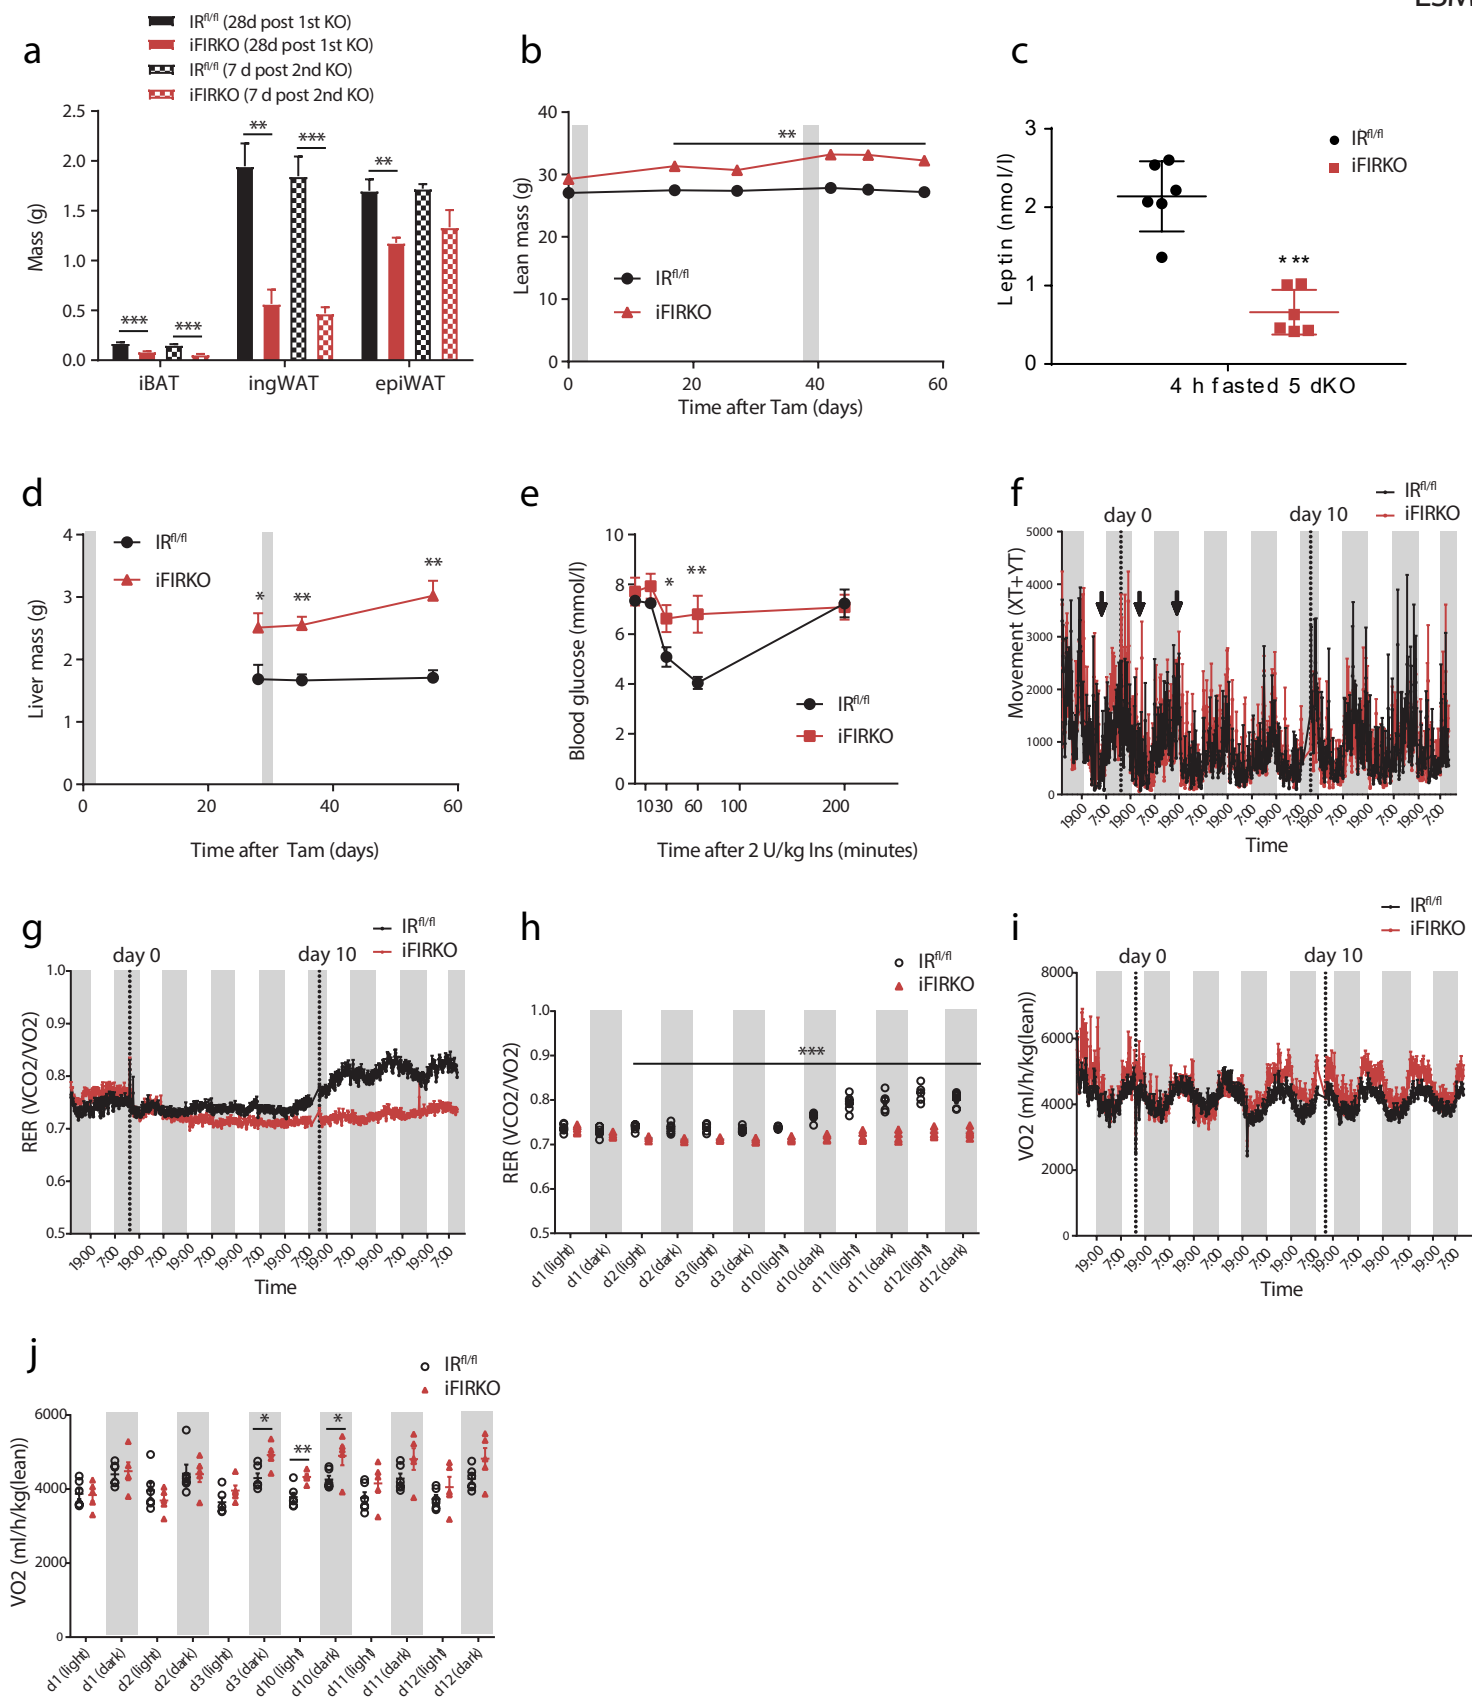

ESM Fig.2: Diet induced obese mice chronically lose fat tissue mass and demonstrate reduced Leptin levels by induction of adipose tissue specific insulin receptor knockout while, in parallel, mice are protected from diet induced obesity and present with increased liver mass, when knockout is induced before HFD feeding started (a) Weight of adipose depots (iBAT, ingWAT and epiWAT) in HFD-induced obese mice after induction of IR knockout. Two different time points after the tam-induced knockout are shown: 28 days after the first and 7 days after the second tamoxifen induction (n=4 for IR<sup>fl/fl</sup> 28d post 1<sup>st</sup> KO;4 for iFIRKO 28d post 1<sup>st</sup> KO;4 for IR<sup>fl/fl</sup> 7d post 2<sup>nd</sup> KO;5 for iFIRKO 7d post 2<sup>nd</sup> KO). (b) Lean mass of HFD-induced obese mice before and after induction of IR knockout in adipose tissue (n=4-12 for IR<sup>fl/fl</sup>;5-15 for iFIRKO). (c) Concentration of circulating leptin in HFD-induced obese mice measured 5 days after tam-induced IR knockout (n=6;6). (d) Liver mass of HFD-induced obese iFIRKO and IR<sup>fl/fl</sup> control mice at different time points after induction of IR knockout (n=4 for IR<sup>fl/fl</sup> ;4-5 for iFIRKO). (f) ITT in HFD-induced obese mice, 7 days after tam-induced insulin receptor adipose-tissue specific knockout (n=7 for IR<sup>fl/fl</sup>;7 for iFIRKO). (g) Movement (XT+YT) measured in metabolic cage (n=6 for IR<sup>fl/fl</sup>;5 for iFIRKO). (h) RER over time of the day (n=6;5). (i) Average RER for dark or light cycle (n=6 for IR<sup>fl/fl</sup> ;5 for iFIRKO). (j) oxygen consumption rate (VO<sub>2</sub>) over time of the day (n=6;5). (k) Average VO<sub>2</sub> for dark or light cycle (n=6;5). Student's t-test \*=p<0.05, \*\*=p<0.01, \*\*\*=p<0.005. Tam, tamoxifen; ITT, insulin tolerance test; RER, respiratory exchange ration.

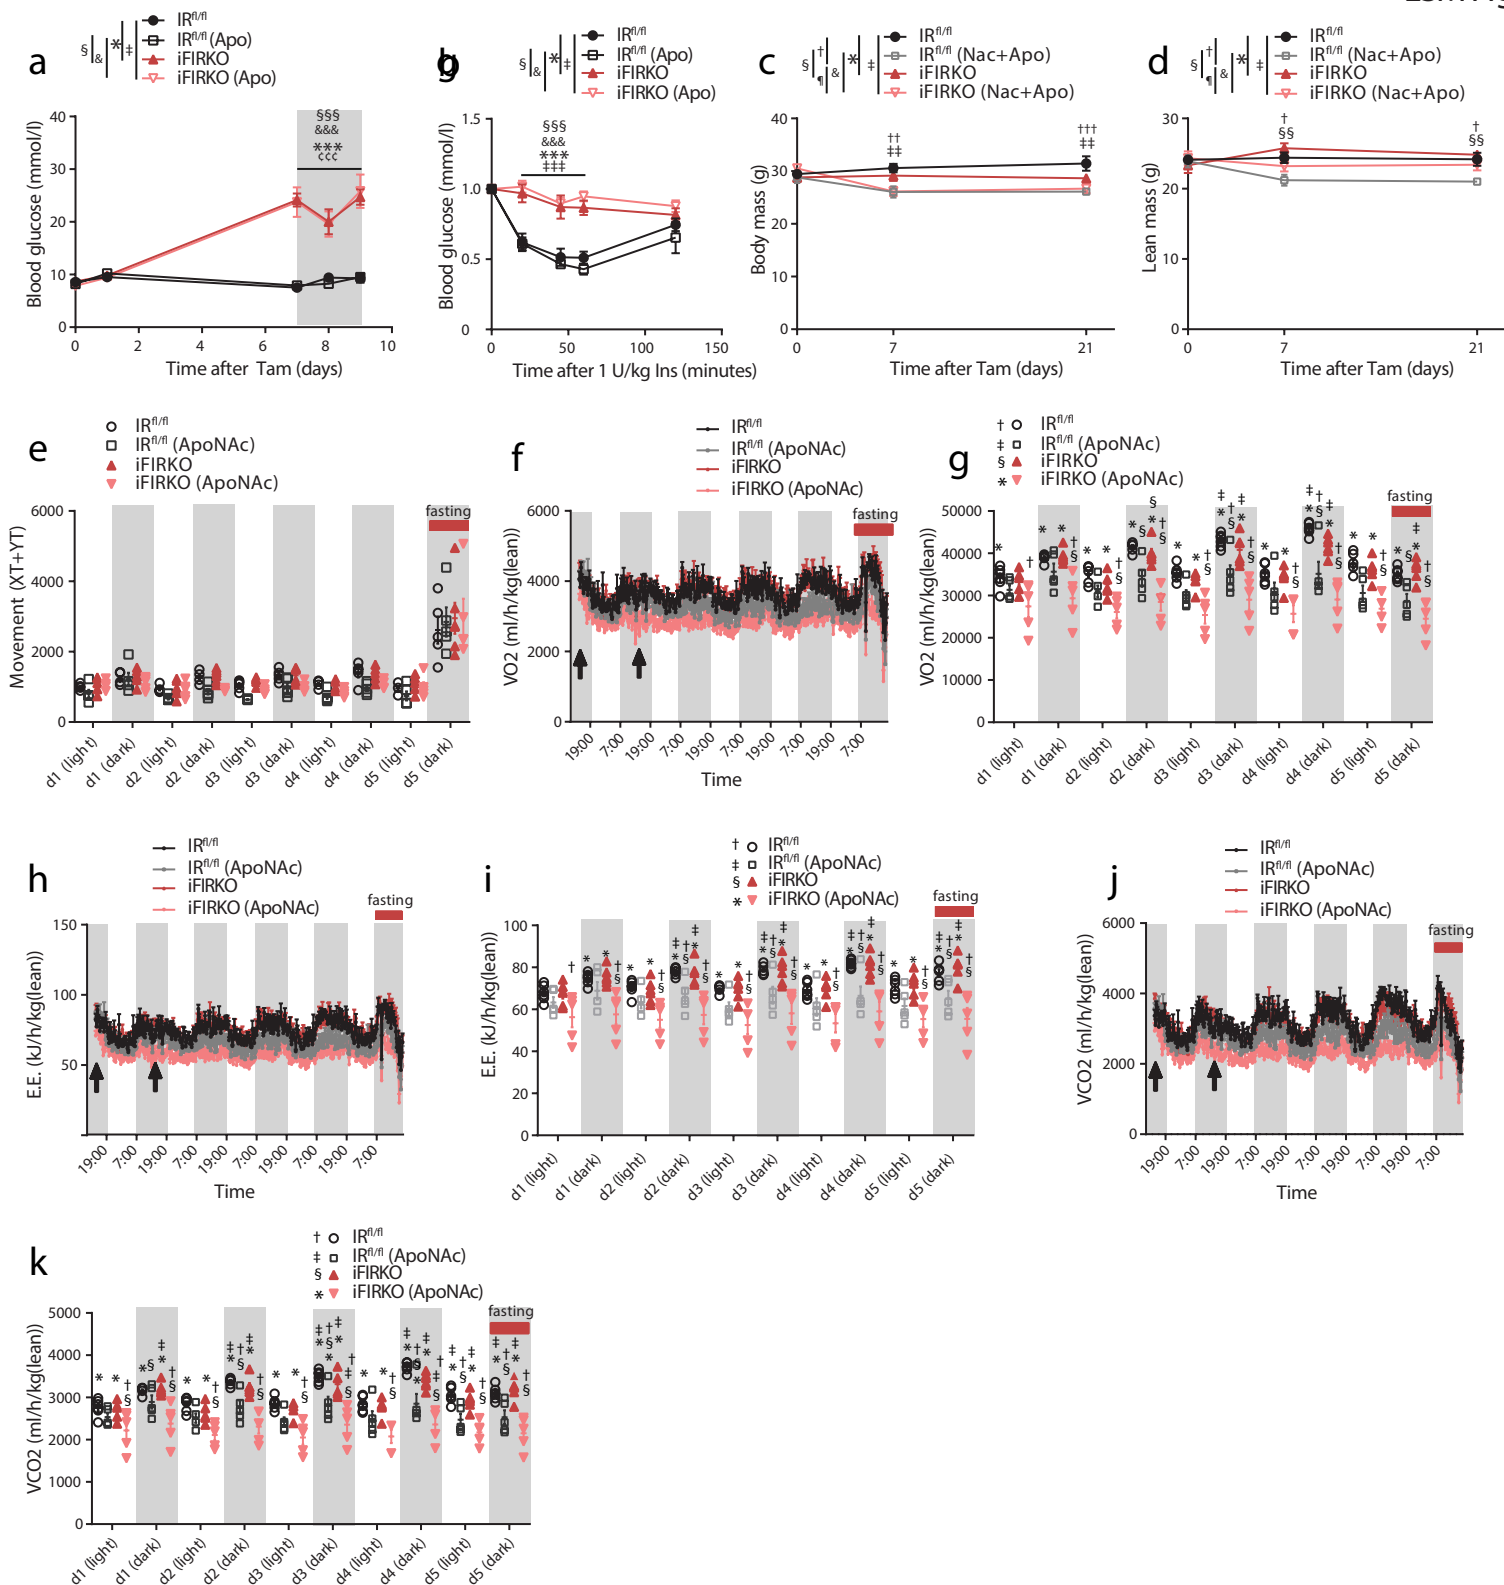

ESM Fig. 3: Supplementation of drinking water with apocynin (Apo, 40 mM) alone cannot reproduce the beneficial effects of the antioxidant cocktail (apocynin (Apo, 40mM) and (NAC, 15 mM)), whereas antioxidant cocktail supplementation reduces VO<sub>2</sub> and VCO<sub>2</sub> levels, both in iFIRKO and wild-type littermates. (a) Ad libitum blood glucose in iFIRKO and IR<sup>fl/fl</sup> mice either in the presence or absence of apocynin supplementation in the drinking water (n=6 for IR<sup>fl/fl</sup> – Apo+NAC;6 for IR<sup>fl/fl</sup> + Apo+NAC;5 for iFIRKO + Apo+NAC;6 for iFIRKO – Apo+NAC). (b) ITT, blood glucose over time in minutes after intraperitoneal injection of 1 U insulin/kg after 8 hours of fasting in iFIRKO and IR<sup>fl/fl</sup> mice either in the presence or absence of apocynin supplementation. (n=6 for IR<sup>fl/fl</sup> – Apo+NAC;6 for IR<sup>fl/fl</sup> + Apo+NAC;5 for iFIRKO + Apo+NAC;6 for iFIRKO – Apo+NAC). (c) Body mass and (d) lean mass measure with EchoMRI in iFIRKO and IR<sup>fl/fl</sup> mice either in the presence or absence of Apo+NAC supplementation (n=6 for IR<sup>fl/fl</sup> – Apo+NAC;6 for IR<sup>fl/fl</sup> + Apo+NAC;5 for iFIRKO + Apo+NAC;6 for iFIRKO – Apo+NAC). (e) Movement (XT+YT) measured in metabolic cage (n=6;5;6;5). (f) oxygen consumption (VO<sub>2</sub>) over time of the day. (g) VO<sub>2</sub> area under the curve for dark or light cycle (n=6 for IR<sup>fl/fl</sup> – Apo+NAC;5 for IR<sup>fl/fl</sup> + Apo+NAC;6 for iFIRKO + Apo+NAC;5 for iFIRKO – Apo+NAC). (h) E.E. over time of the day (n=6 for IR<sup>fl/fl</sup> – Apo+NAC;5 for IR<sup>fl/fl</sup> + Apo+NAC;6 for iFIRKO + Apo+NAC;5 for iFIRKO – Apo+NAC). (i) Average E.E. for dark or light cycle in iFIRKO and IR<sup>fl/fl</sup> mice (n=6;5;6;5). (j) VCO<sub>2</sub> over time of the day. (k) Average VCO<sub>2</sub> for dark or light cycle (n=6 for IR<sup>fl/fl</sup> – Apo+NAC;5 for IR<sup>fl/fl</sup> + Apo+NAC;6 for iFIRKO + Apo+NAC;5 for iFIRKO – Apo+NAC). Arrow symbol indicates time of tamoxifen gavage. Mean+/-SEM. 2way ANOVA Turkey's multiple comparisons test one sign(e.g.\*)=p<0.05, two signs(e.g.)\*\*=p<0.01, three signs(e.g.\*\*\*)=p<0.005, four signs (e.g.\*\*\*\*)=p<0.001. ITT, insulin tolerance test; EE, energy expenditure; VCO<sub>2</sub>, CO<sub>2</sub> production. <sup>+</sup>p<0.05, <sup>++</sup>p<0.01, <sup>+++</sup>p<0.001, <sup>++++</sup>p<0.0001 for IR<sup>fl/fl</sup> vs. IR<sup>fl/fl</sup> (Apo+NAC), \*p<0.05, \*\*p<0.01, \*\*\*p<0.001, \*\*\*\*p<0.0001 for IR<sup>fl/fl</sup> vs. iFIRKO, <sup>‡</sup>p<0.05, <sup>‡‡</sup>p<0.01, <sup>‡‡‡</sup>p<0.001, <sup>‡‡‡‡</sup>p<0.0001 for IR<sup>fl/fl</sup> vs. iFIRKO (Apo+NAC), <sup>§</sup>p<0.05, <sup>§§</sup>p<0.01, <sup>§§§</sup>p<0.001, <sup>§§§§</sup>p<0.0001 for IR<sup>fl/fl</sup> (Apo+NAC) vs. iFIRKO, <sup>¶</sup>p<0.05, <sup>¶¶</sup>p<0.01, <sup>¶¶¶</sup>p<0.001, <sup>¶¶¶¶</sup>p<0.0001 for iFIRKO vs. iFIRKO (Apo+NAC), <sup>&</sup>p<0.05, <sup>&&</sup>p<0.01, <sup>&&&</sup>p<0.001, <sup>&&&&</sup>p<0.0001 for IR<sup>fl/fl</sup> (Apo+NAC) vs. iFIRKO (Apo+NAC).

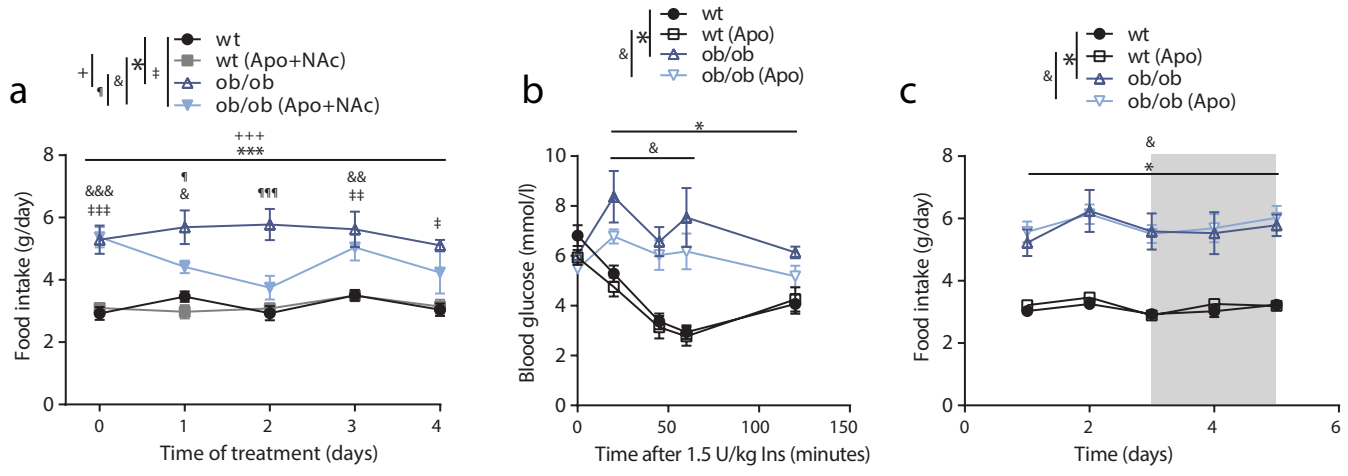



ESM Fig. 4: Supplementation of drinking water with apocynin (Apo, 40 mM) and (NAC, 15 mM) reduced hyperphagia in female mice, whereas supplementation with apocynin (Apo, 40 mM) alone failed to reproduce this phenotype. (a) Daily food intake in wild-type and *ob/ob* female mice in the presence or absence of Apo+NAC administration (n=9 for wt – Apo+NAC;7 for wt + Apo+NAC;5 for *ob/ob* + Apo+NAC;4 for *ob/ob* - Apo+NAC). (b) ITT in wild-type and *ob/ob* mice in the presence or absence of apocynin administration (n=10 for wt – Apo+NAC;9 for wt + Apo+NAC;3 for *ob/ob* + Apo+NAC;4 for *ob/ob* - Apo+NAC). (c) Daily food intake in wild-type and *ob/ob* mice in the presence or absence of apocynin administration (n=11 for wt – Apo+NAC;11 for wt + Apo+NAC;3 for *ob/ob* + Apo+NAC;4 for *ob/ob* - Apo+NAC). 2way ANOVA Turkey's multiple comparisons test one sign (e.g.\*)=p<0.05, two signs(e.g.)\*\*=p<0.01, three signs(e.g.\*\*\*)=p<0.005, four signs (e.g.\*\*\*\*)=p<0.001. ITT, insulin tolerance test. in (a) \*p < 0.05, \*\*p < 0.01, \*\*\*p < 0.001 for wt vs *ob/ob*; ‡p < 0.05, ††p < 0.01, †††p < 0.001 for wt vs *ob/ob* (Apo+NAC); +p < 0.05, +++p < 0.001 for wt (Apo+NAC) vs *ob/ob*; ¶p < 0.05, ¶¶p < 0.01, ¶¶¶p < 0.001 for *ob/ob* vs *ob/ob* (Apo+NAC); &p < 0.05, &&p < 0.01, &&&p < 0.001 for wt (Apo+NAC) vs *ob/ob* (Apo+NAC). In (b-c) \*p < 0.05 for wt vs *ob/ob*; &p<0.05 for wt (Apo) vs. *ob/ob* (Apo). In (a–c) difference is significant for all time points below the line. d, day; Ins, insulin; WT, wild-type
